# Supplementary material for: L-Glyceraldehyde Inhibits Neuroblastoma Cell Growth via a Multi-Modal Mechanism on Metabolism and Signaling
Source: MDPI journal article supplement (doi:10.3390/cancers16091664), 2024-04-25
Supplement: s1 [file s1]

GI-M-EN

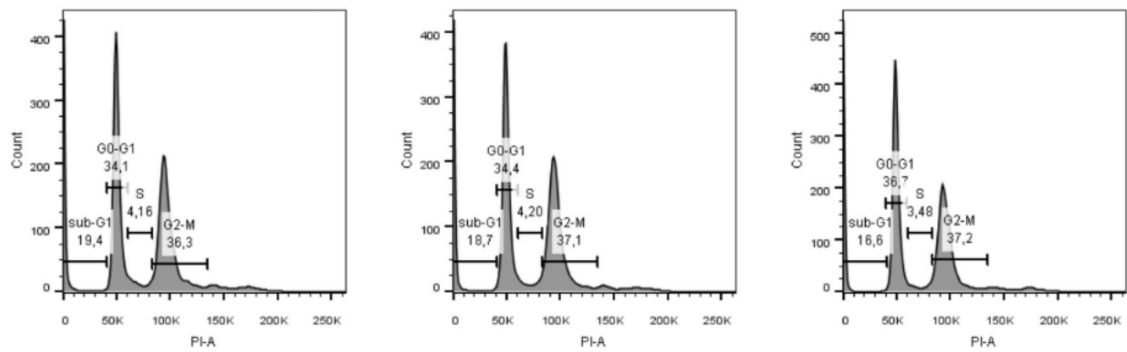

DBPS 72h\_Tube\_001.fcs  
Single Cells  
8422

DBPS 72h\_Tube\_002.fcs  
Single Cells  
8224

DBPS 72h\_Tube\_003.fcs  
Single Cells  
8169

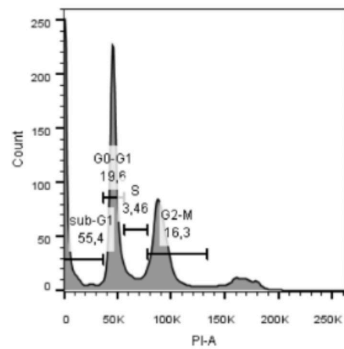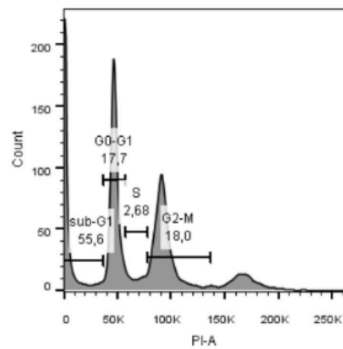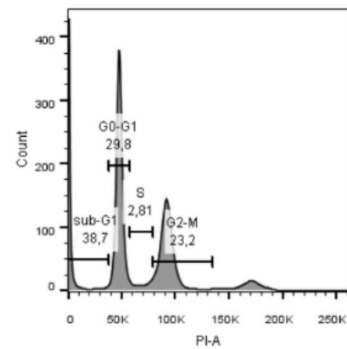

L-GA 72h\_Tube\_001.fcs  
Single Cells  
9126

L-GA 72h\_Tube\_002.fcs  
Single Cells  
8736

L-GA 72h\_Tube\_003.fcs  
Single Cells  
8929

SK-N-AS

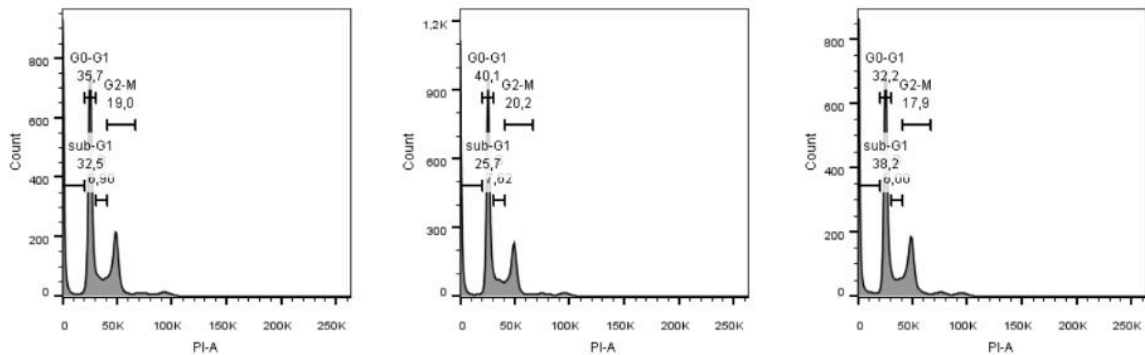

DBPS 72h\_Tube\_001.fcs  
Single Cells  
9454

DBPS 72h\_Tube\_002.fcs  
Single Cells  
9445

DBPS 72h\_Tube\_003.fcs  
Single Cells  
9406

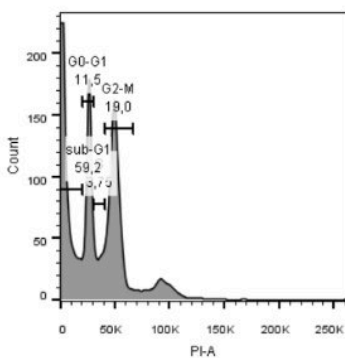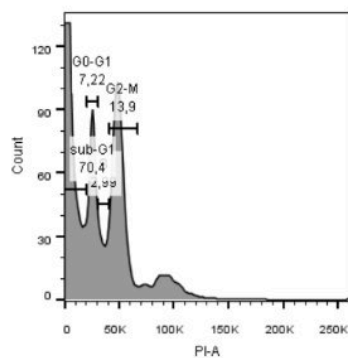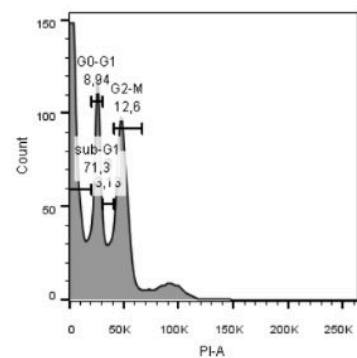

L-GA 72h\_Tube\_001.fcs  
Single Cells  
9566

L-GA 72h\_Tube\_002.fcs  
Single Cells  
9632

L-GA 72h\_Tube\_003.fcs  
Single Cells  
9590
