# Supplementary material for: L-Glyceraldehyde Inhibits Neuroblastoma Cell Growth via a Multi-Modal Mechanism on Metabolism and Signaling
Source: Cancers (Basel). 2024 Apr 25;16(9):1664. doi: 10.3390/cancers16091664 (PMC11083149; doi:10.3390/cancers16091664)
Supplement: Supplementary file 1 [file cancers-16-01664-s001.zip]

Archive with 4 entries (4 files):
- Supp_figure1C_1.pdf
- Supp_figure1C_2.pdf
- Supp_figure1C_3.pdf
- Supp_figure1C_4.pdf
