# Supplementary figures and images for: L-Glyceraldehyde Inhibits Neuroblastoma Cell Growth via a Multi-Modal Mechanism on Metabolism and Signaling
Source: MDPI journal article supplement (doi:10.3390/cancers16091664), 2024-04-25

# CLB-GA

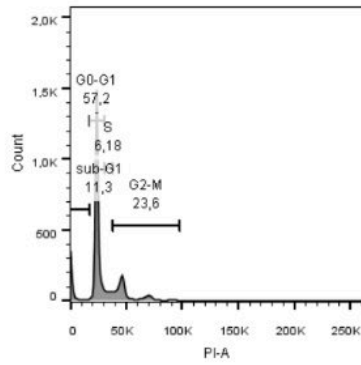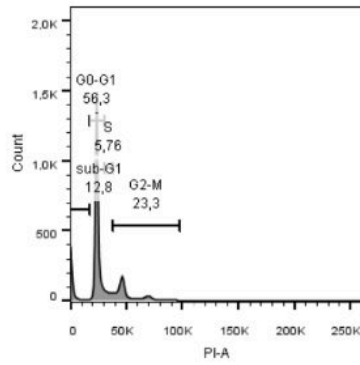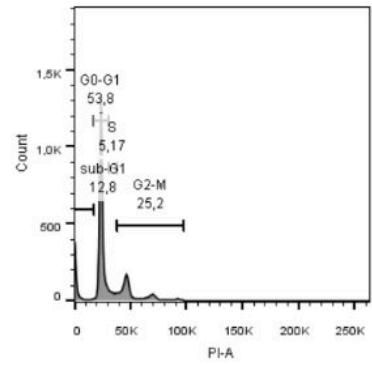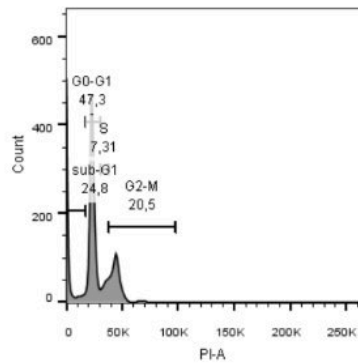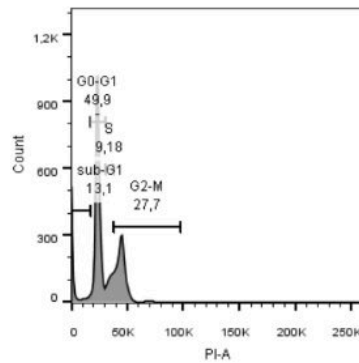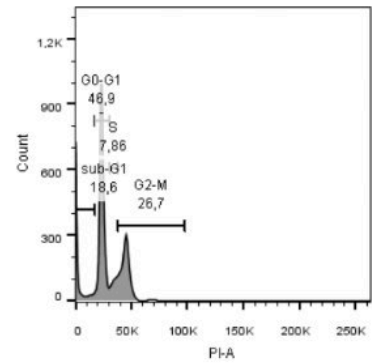

# IMR5/75

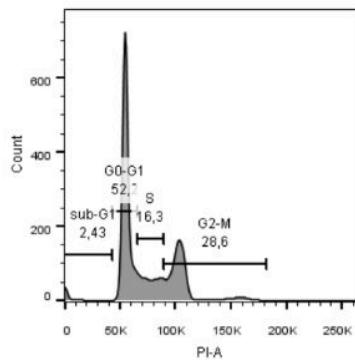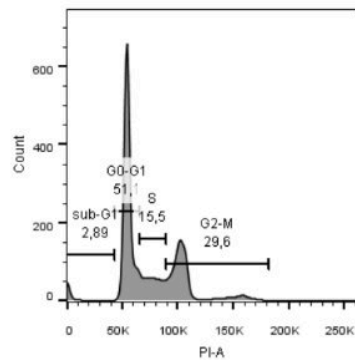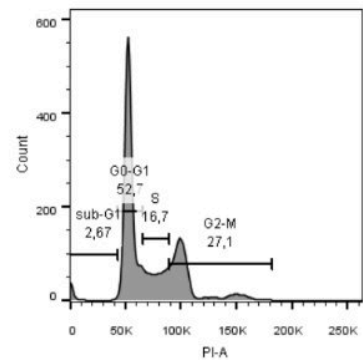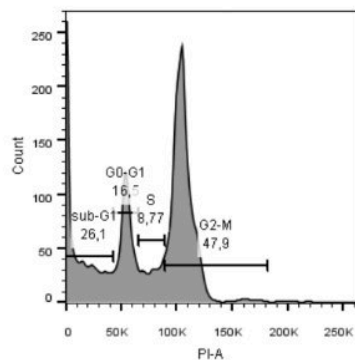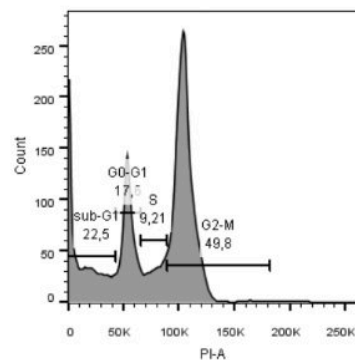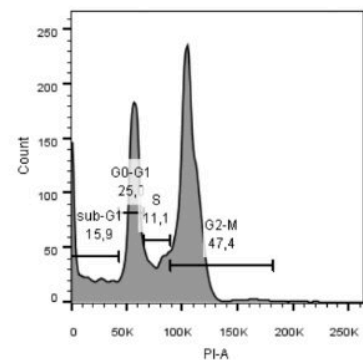

Supplement: s1 [file s1]

BE(2)-C

PBS

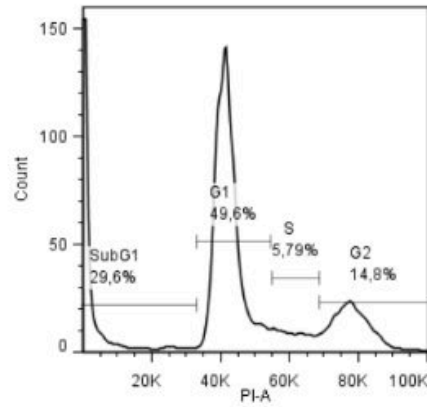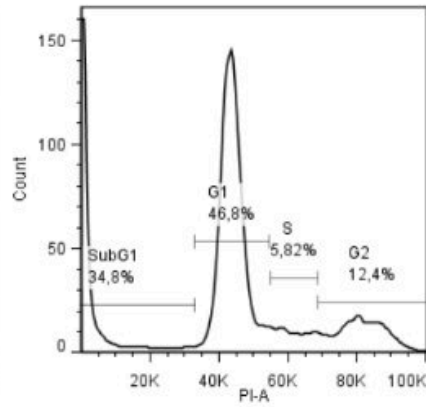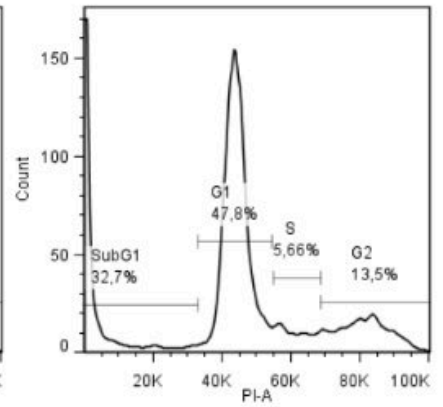

L-GA

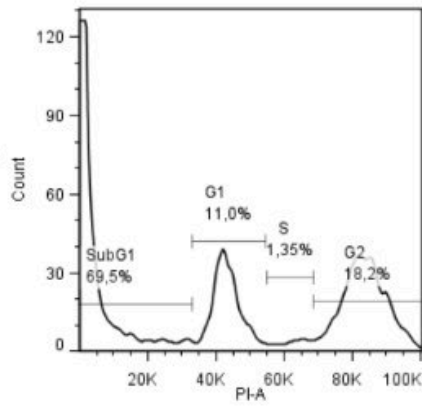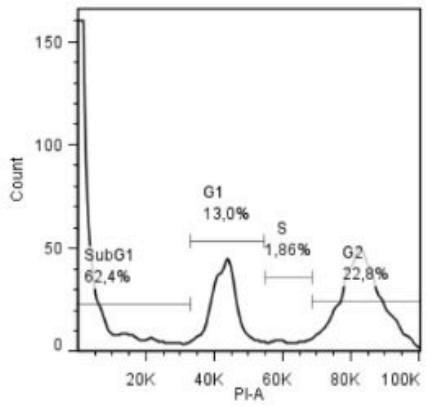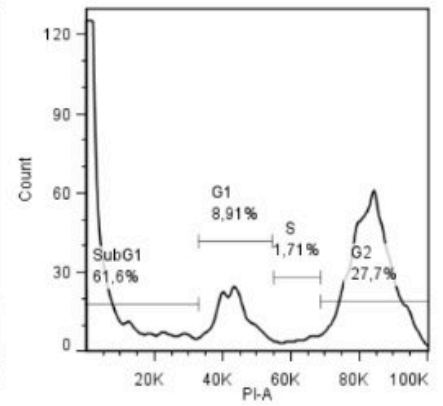

Supplement: s1 [file s1]

# SH-SY5Y

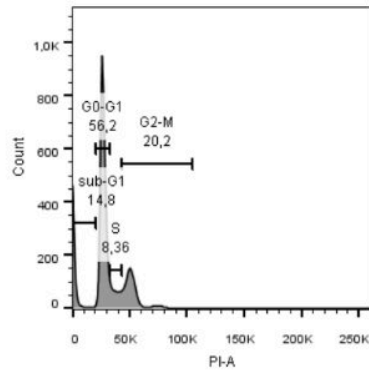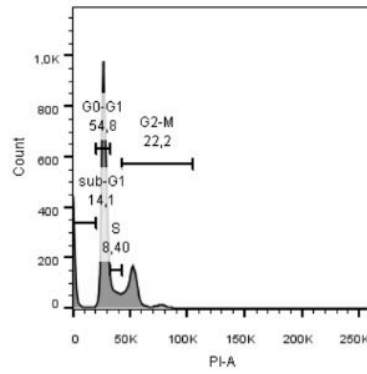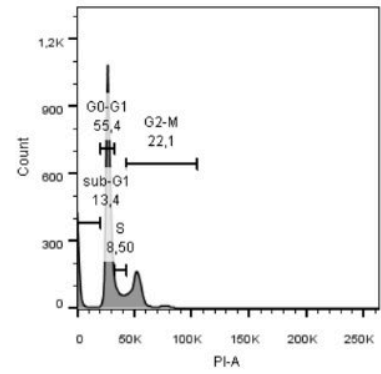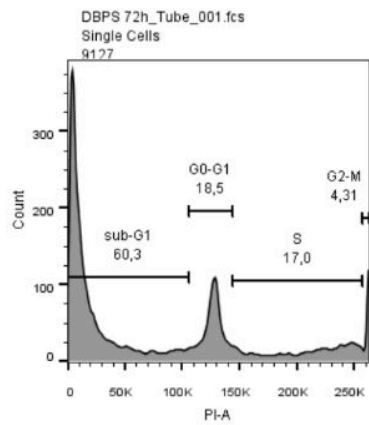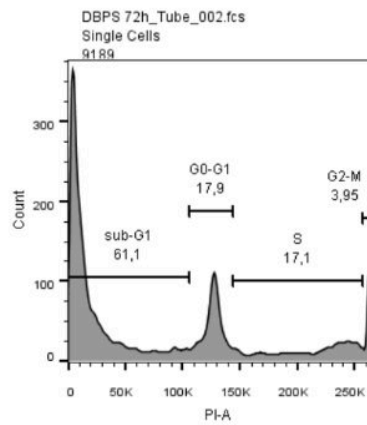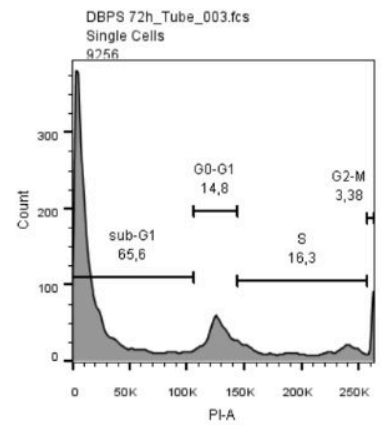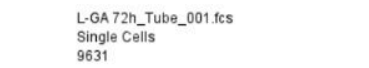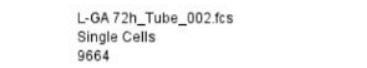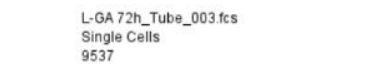

# VH-7

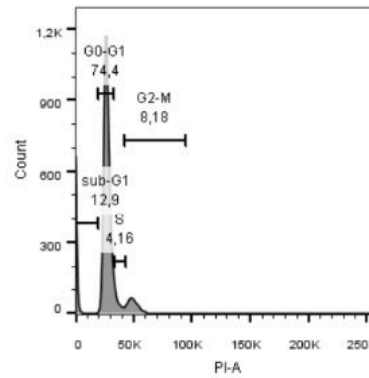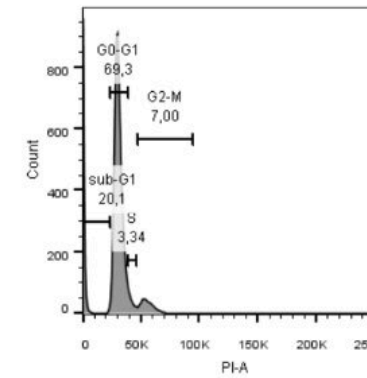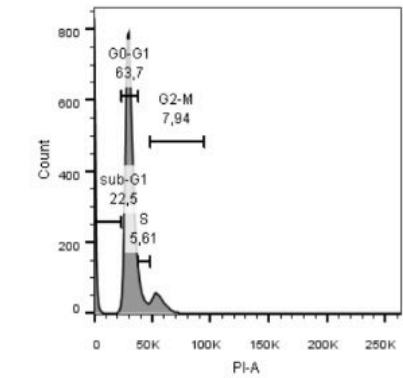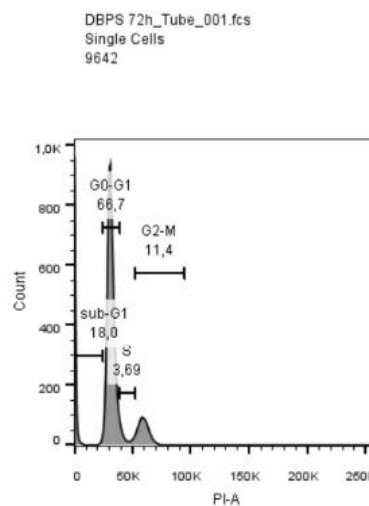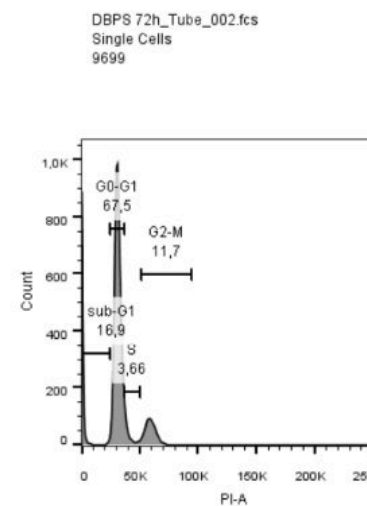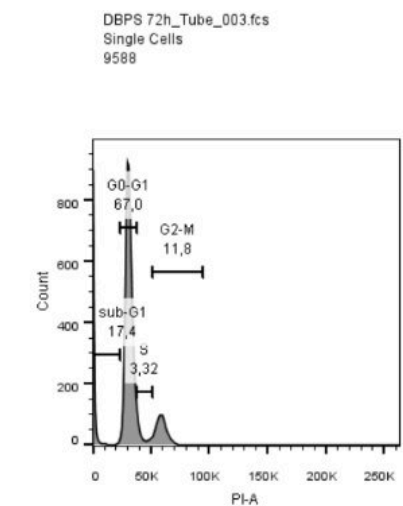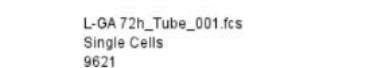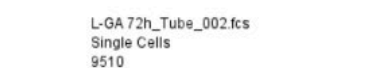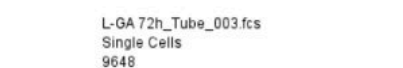

Supplement: s1 [file s1]
